# Supplementary material for: Experimental and theoretical studies of a pyridylvinyl(benzoate) based coordination polymer structure
Source: Royal Society of Chemistry journal article supplement (doi:10.1039/d1ce01290h), 2021-01-01
Supplement: d1ce01290h1.pdf [file d1ce01290h1.pdf]

## Supporting Information

# Experimental and Theoretical Studies of a Pyridylvinyl(benzoate) Based Coordination Polymer Structure

*Yuri Dezotti,<sup>a</sup> Manoel Victor Frutuoso Barrionuevo,<sup>a</sup> Ingrid Fernandes Silva,<sup>b</sup> Marcos Antônio Ribeiro,<sup>c</sup> Rafael Añez,<sup>d</sup> Humberto Osório Stumpf,<sup>b</sup> Miguel Angel San-Miguel,<sup>a\*</sup> Wdeson Pereira Barros<sup>a\*</sup>*

<sup>a</sup>Instituto de Química, Universidade Estadual de Campinas, SP 13083-970, Brazil

<sup>b</sup>Departamento de Química, ICEx, Universidade Federal de Minas Gerais, Av. Antônio Carlos 6627, Belo Horizonte, MG, 31270-901, Brazil

<sup>c</sup>Departamento de Química, Universidade Federal do Espírito Santo, Vitória, ES 29075-910, Brazil.

<sup>d</sup>Laboratorio de Química Física y Catálisis Computacional, Centro de Química, Instituto Venezolano de Investigaciones Científicas, Caracas 21827, Venezuela.

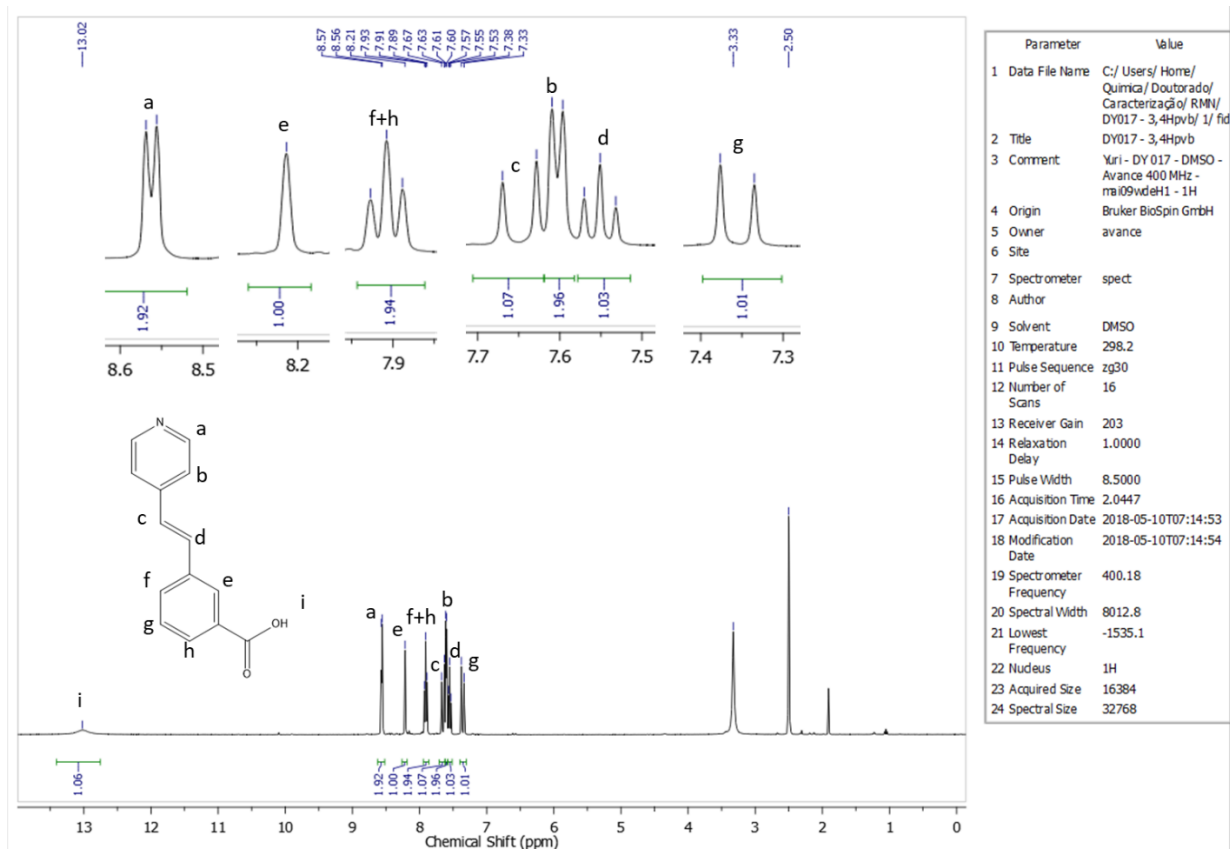

Figure S1.  $^1\text{H}$  NMR spectrum in  $\text{dmsO-d}_6$  for the 3,4-Hpvb.

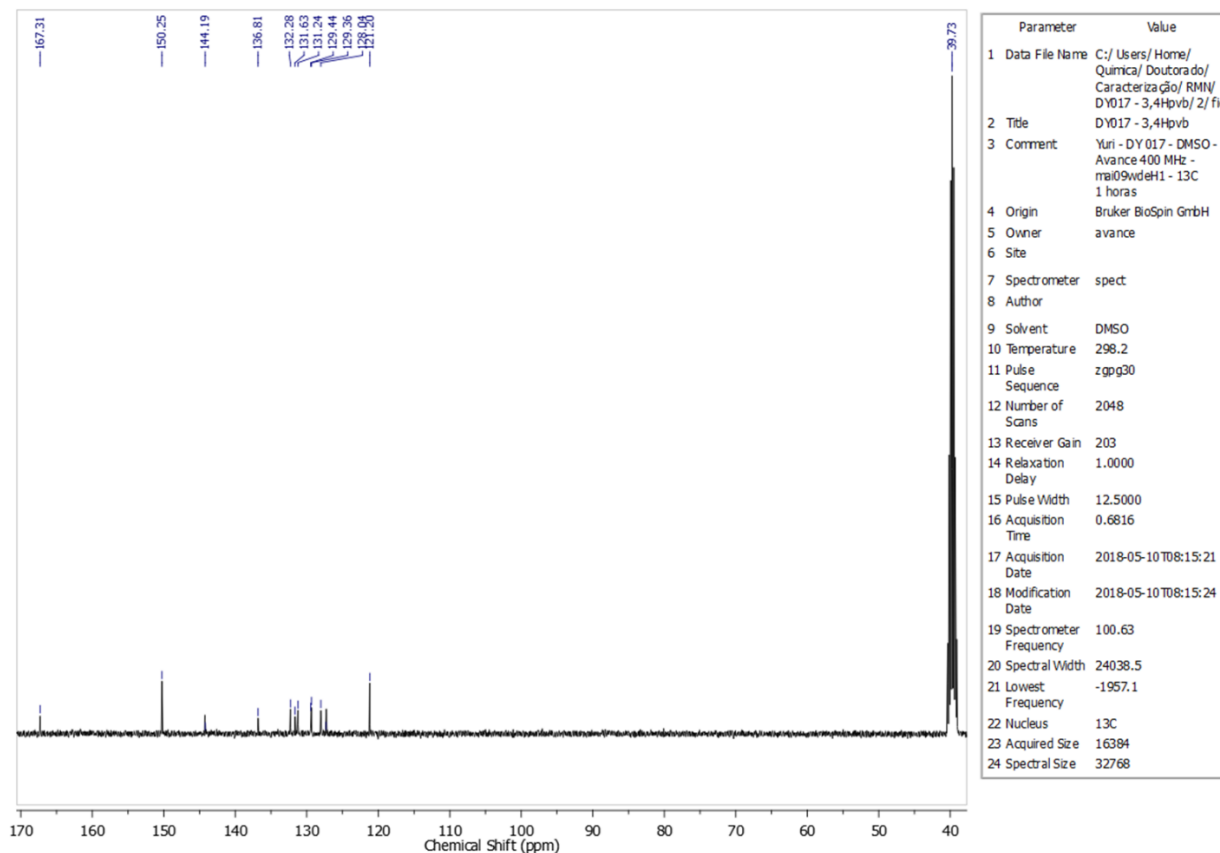

**Figure S2.**  $^{13}\text{C}$  NMR spectrum in dms $o$ -d $_6$  for the **3,4-Hpvb**.

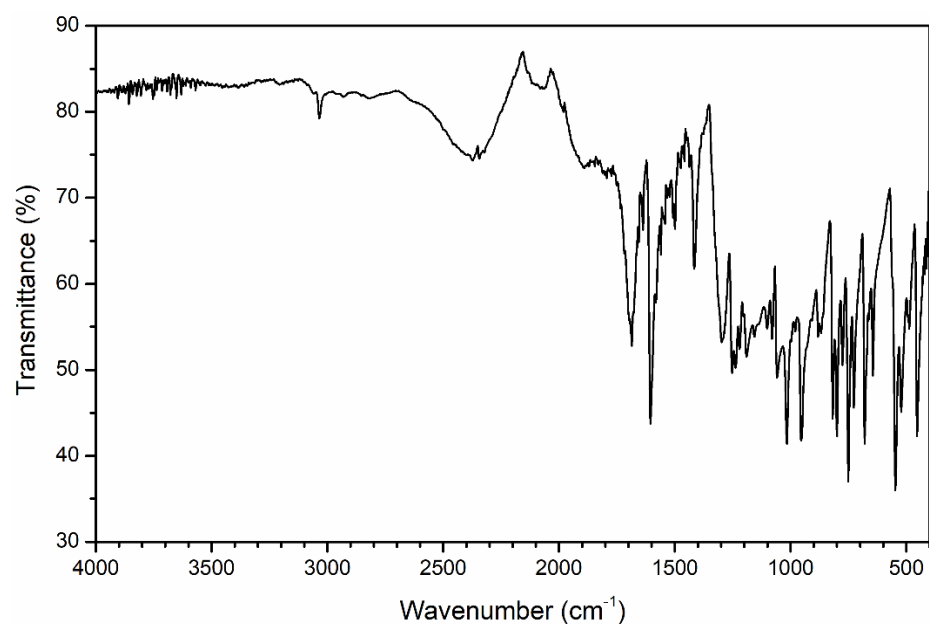

**Figure S3.** FT-IR (ATR) spectrum for the **3,4-Hpvb**.

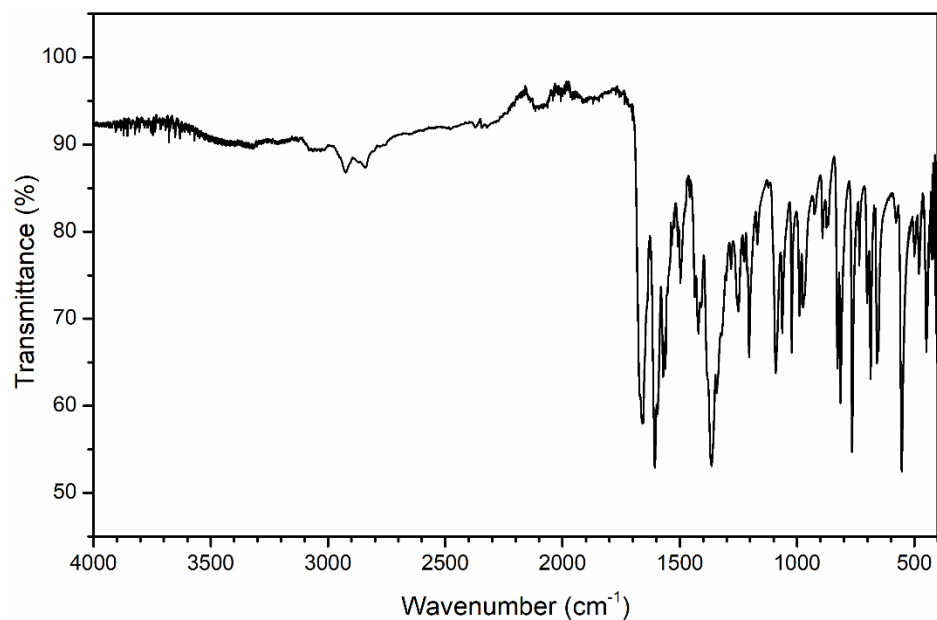

**Figure S4.** FT-IR (ATR) spectrum for compound **1**.

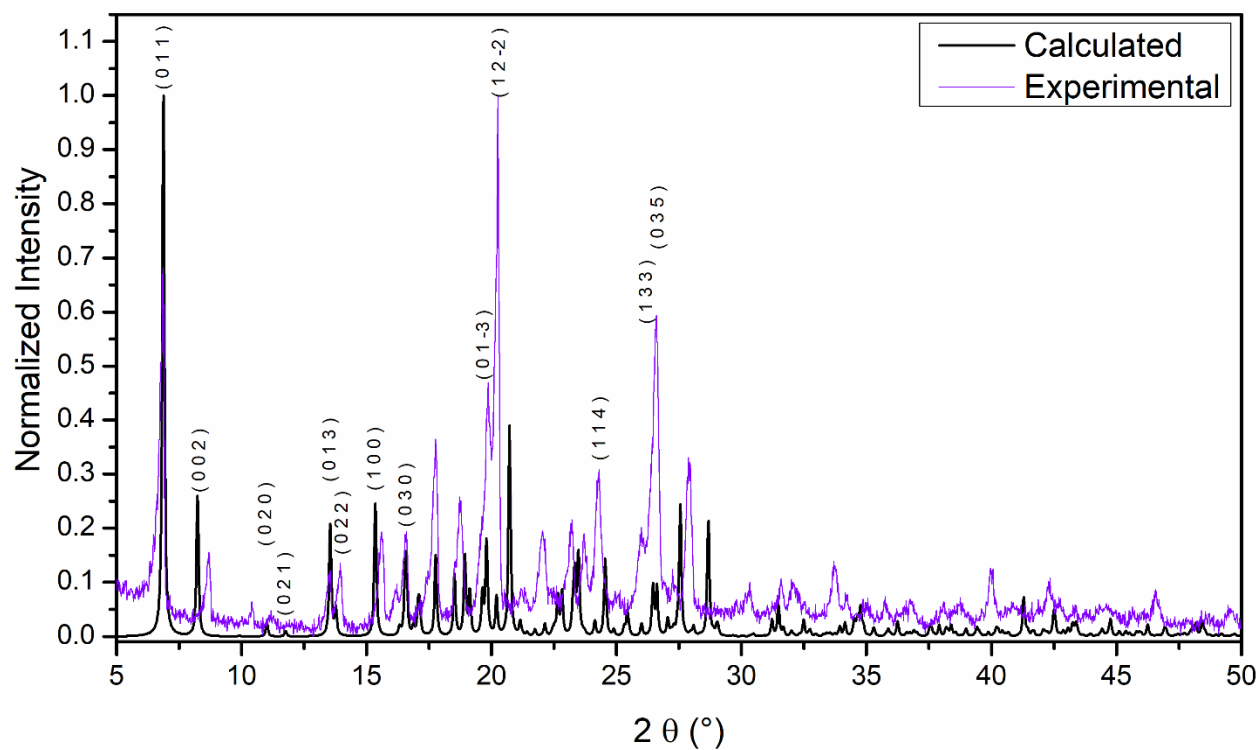

**Figure S5.** Experimental and calculated PXRD pattern for compound **1**. Some (hkl) reflection indexes from the calculated PXRD pattern are shown for comparison.

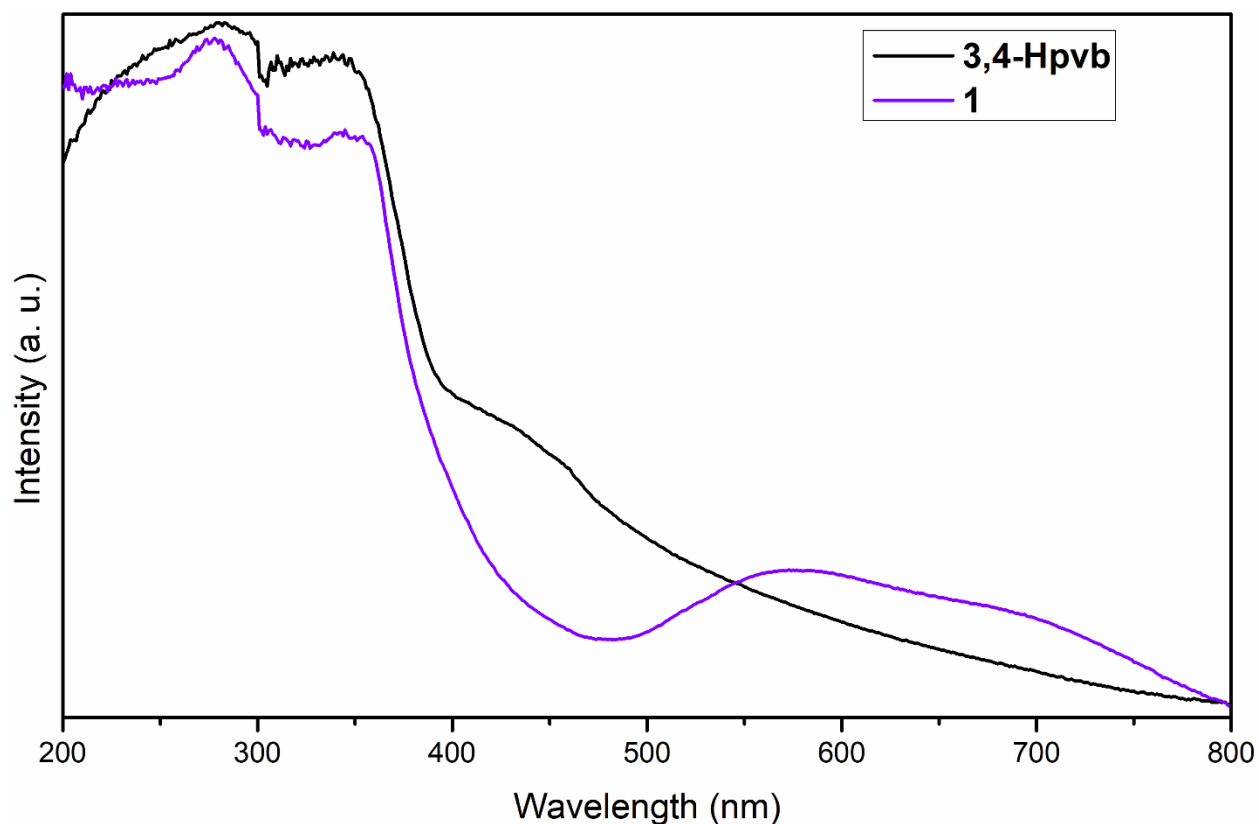

**Figure S6.** Electronic spectra obtained by the DRS method for the **3,4-Hpvb** pre-ligand (black line), with  $\lambda_{\text{max}}$  around 280, 350, and 440 nm, characteristic of intra-ligand transitions, and for compound **1** (blue line), with  $\lambda_{\text{max}}$  around 580 and 700 nm, characteristic of d-d transitions.

**Table S1.** Continuous Shape Measures (CShM) analysis for compound **1**.

| Coordination number | SHAPE label | Reference Polyhedra               | Symmetry        | CShM value <sup>a</sup> |
|---------------------|-------------|-----------------------------------|-----------------|-------------------------|
| 4                   | SP-4        | Square                            | D <sub>4h</sub> | 0.06008                 |
|                     | T4          | Tetrahedron                       | T <sub>d</sub>  | 33.37338                |
|                     | SS-4        | Seesaw                            | C <sub>2v</sub> | 18.41743                |
|                     | vTBPY-4     | Axially vacant trigonal bipyramid | C <sub>3v</sub> | 34.59204                |
| 6                   | HP-6        | Hexagon                           | D <sub>6h</sub> | 22.64759                |
|                     | PPY-6       | Pentagonal pyramid                | C <sub>5v</sub> | 26.43905                |
|                     | OC-6        | Octahedron                        | O <sub>h</sub>  | 8.57224                 |
|                     | TPR-6       | Trigonal prism                    | D <sub>3h</sub> | 19.43249                |
|                     | JPPY-6      | Johnson pentagonal pyramid (J2)   | C <sub>5v</sub> | 26.92323                |

<sup>a</sup> The smallest value indicates proximity between the actual coordination sphere and the idealized polyhedron.

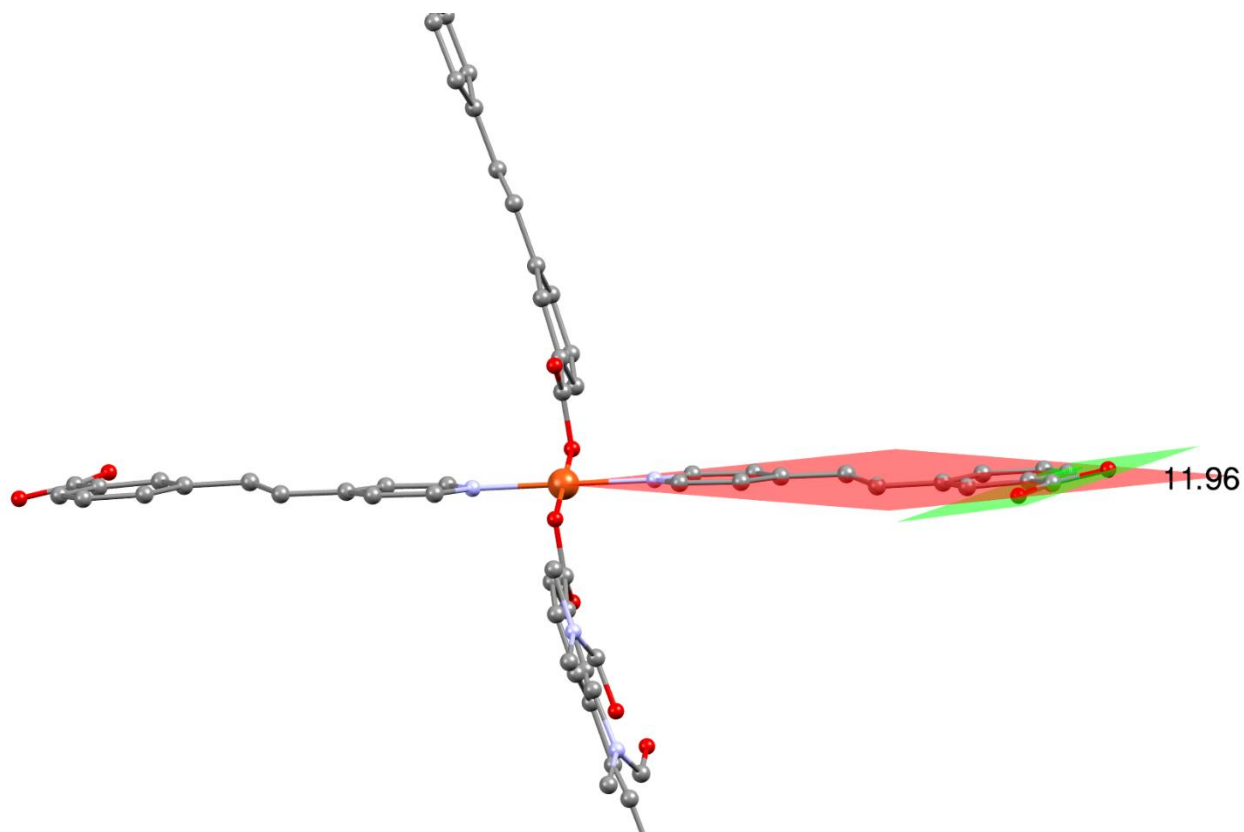

**Figure S7.** Angle between the 3,4-pvb<sup>-</sup> mean-plane and the carboxylate mean-plane. Pink plane: C2 C3 C4 C5 C6 C7 C8 C9 C10 C11 C12 C13 C14 N1 O1 O2 C1; Rms of fitted atoms: 0.1015. Green plane: O1 O2 C1; Rms of fitted atoms: 0.0.

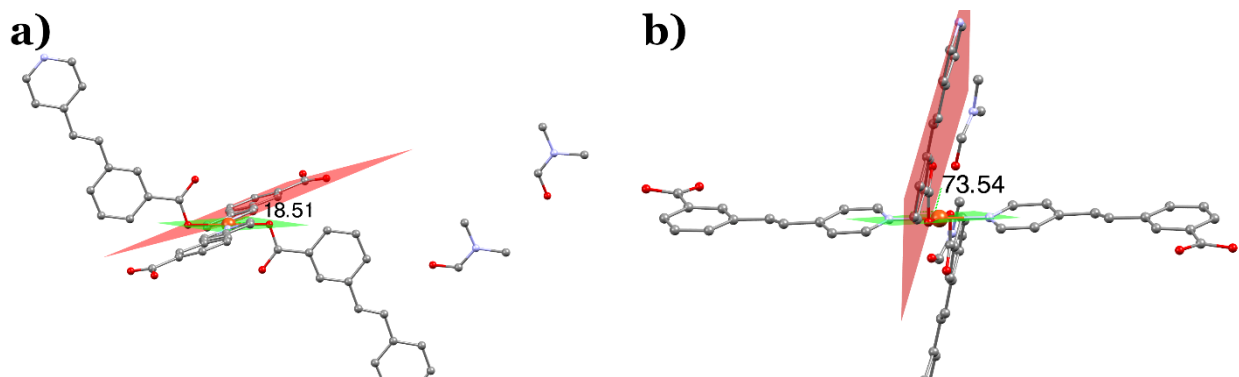

**Figure S8.** Angle between the 3,4-pvb<sup>-</sup> mean-plane and the copper(II) basal plane. a) Green plane: O2 O2<sup>iii</sup> N1<sup>i</sup> N1<sup>ii</sup>; Rms of fitted atoms: 0.0. Pink plane: C2<sup>i</sup> C3<sup>i</sup> C4<sup>i</sup> C5<sup>i</sup> C6<sup>i</sup> C7<sup>i</sup> C8<sup>i</sup> C9<sup>i</sup> C10<sup>i</sup> C11<sup>i</sup> C12<sup>i</sup> C13<sup>i</sup> C14<sup>i</sup> N1<sup>i</sup> O1<sup>i</sup> O2<sup>i</sup> C1<sup>i</sup>; Rms of fitted atoms: 0.1015. b) Green plane: O2 O2<sup>iii</sup> N1<sup>i</sup> N1<sup>ii</sup>; Rms of fitted atoms: 0.0. Pink plane: C2<sup>iii</sup> C3<sup>iii</sup> C4<sup>iii</sup> C5<sup>iii</sup> C6<sup>iii</sup> C7<sup>iii</sup> C8<sup>iii</sup> C9<sup>iii</sup> C10<sup>iii</sup> C11<sup>iii</sup> C12<sup>iii</sup> C13<sup>iii</sup> C14<sup>iii</sup> N1<sup>iii</sup> O1<sup>iii</sup> O2<sup>iii</sup> C1<sup>iii</sup>; Rms of fitted atoms: 0.1015.

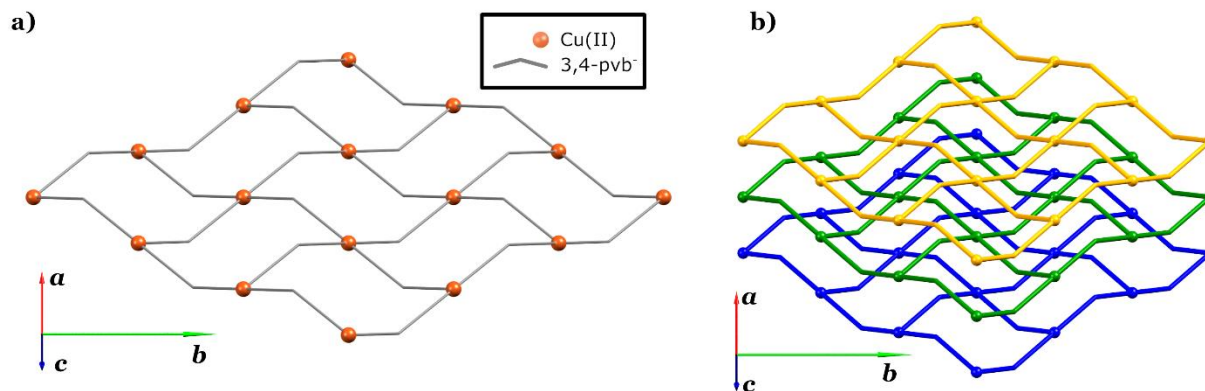

**Figure S9.** Simplified molecular structure of  $\{[\text{Cu}(\mathbf{3,4\text{-pvb}})_2]\cdot 4(\text{dmf})\}_n$  showing a) arrangement between the 4-connected metal nodes and the  $\mathbf{3,4\text{-pvb}}^-$  bridges in one corrugated layer; (b) overall three-dimensional supramolecular structure of  $\{[\text{Cu}(\mathbf{3,4\text{-pvb}})_2]\cdot 4(\text{dmf})\}_n$  with the parallel stacking of the corrugated layers. Solvent molecules are not shown for clarity purposes.

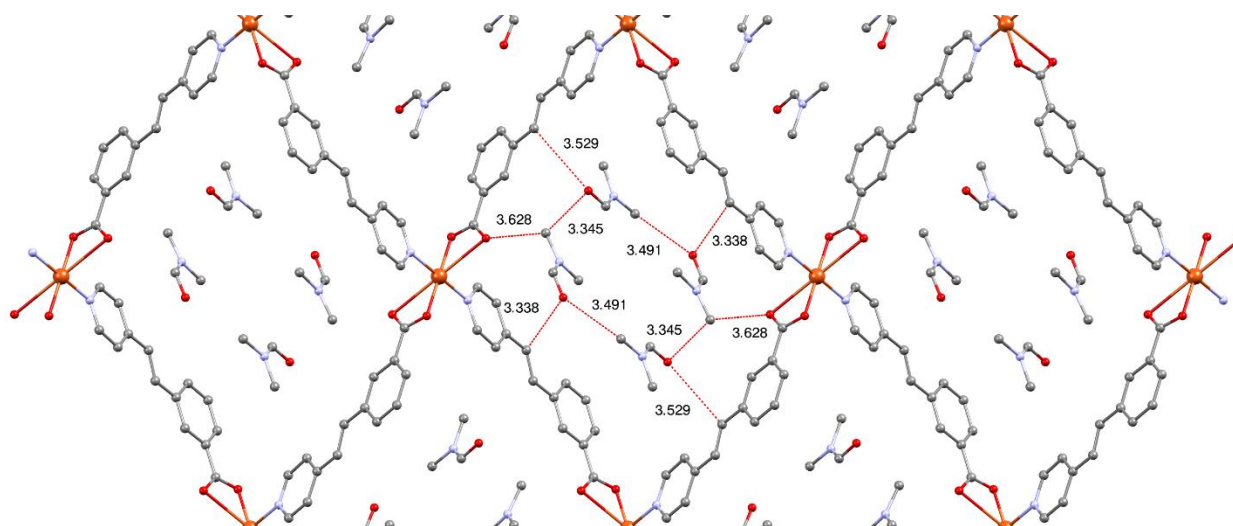

**Figure S10.** Intermolecular interactions between dmf molecules and the  $\mathbf{3,4\text{-pvb}}^-$  moieties (view along the  $a$ -axis).

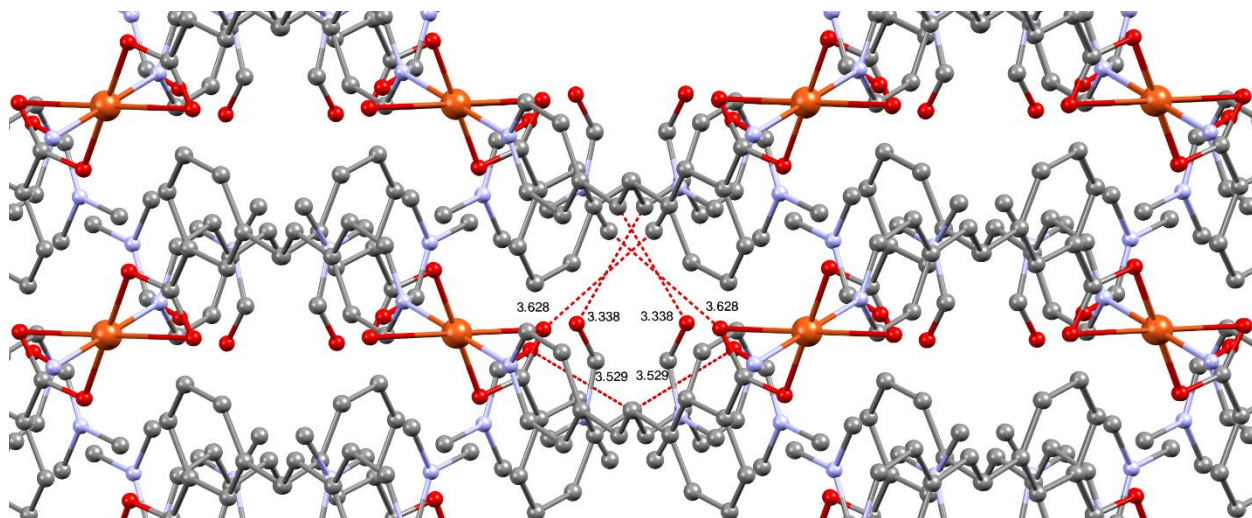

**Figure S11.** Intermolecular interactions between dmf molecules and the 3,4-pvb<sup>-</sup> moieties.

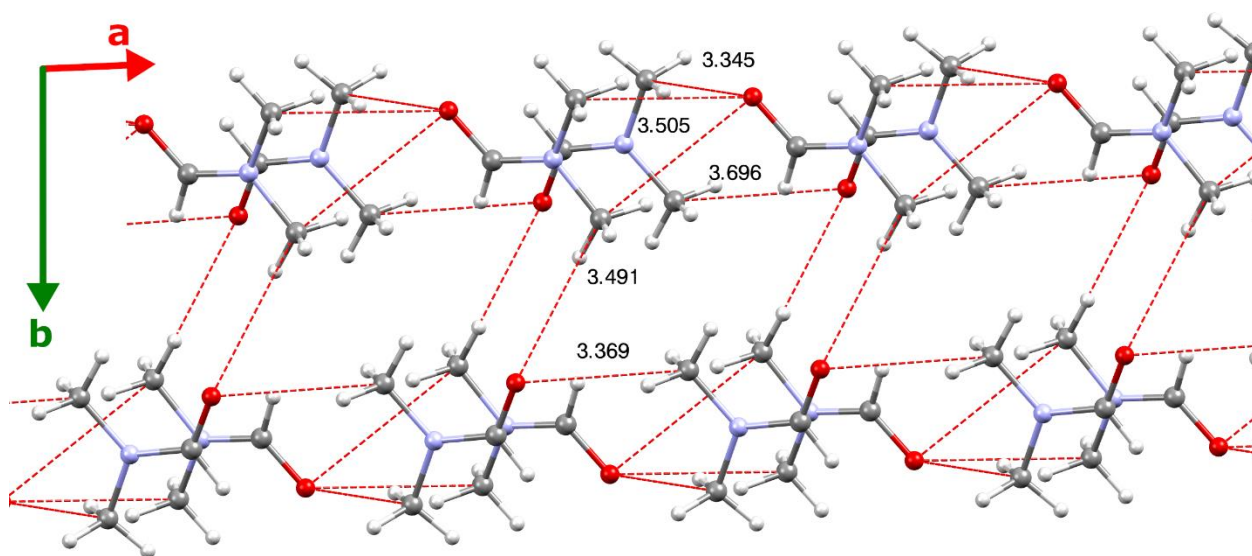

**Figure S12.** Intermolecular interactions between dmf molecules across one rhombus channel (only dmf molecules are shown for the sake of clarity).



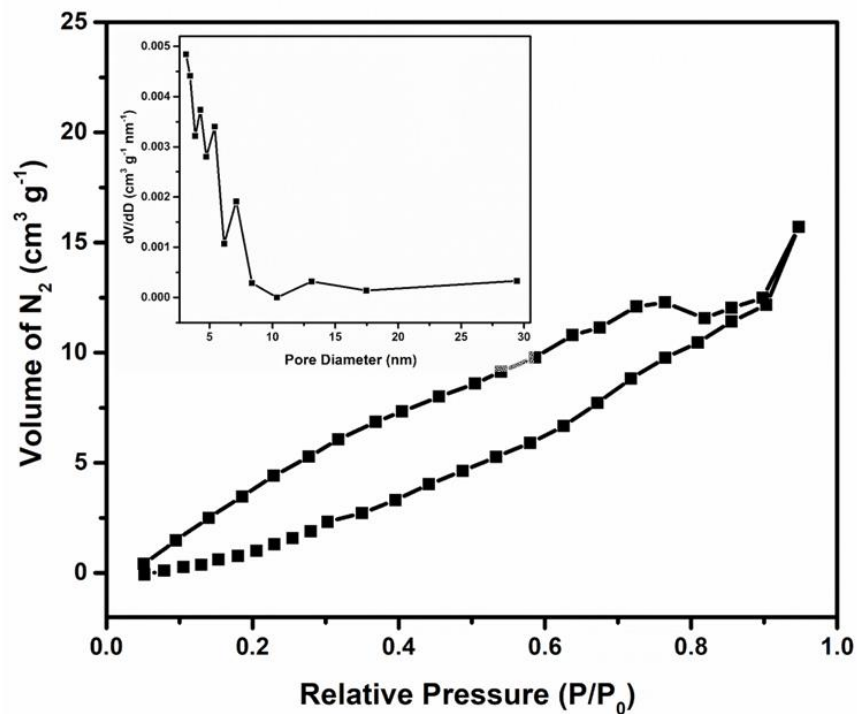

**Figure S13.** N<sub>2</sub> adsorption-desorption isotherm pattern for **1**. Insert: Pore size distribution calculated from the N<sub>2</sub> adsorption-desorption isotherm by the BJH method.

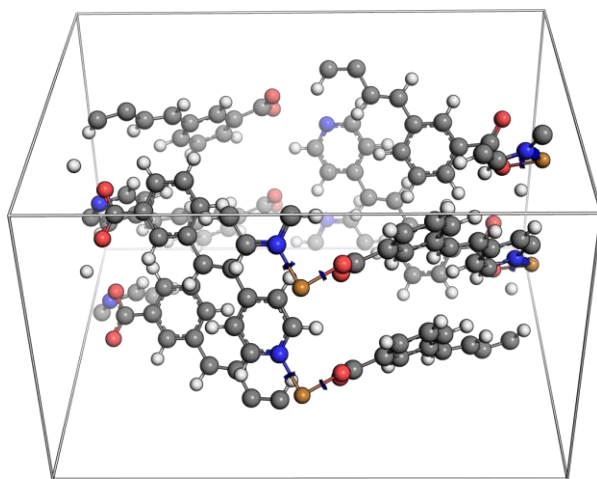

**Figure S14.** NCI isosurface (0.3 bohr) representation for the first domain.

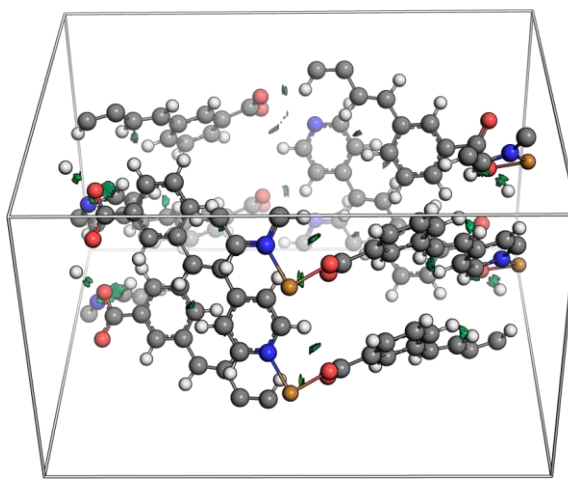

**Figure S15.** NCI isosurface (0.3 bohr) representation for the second domain.

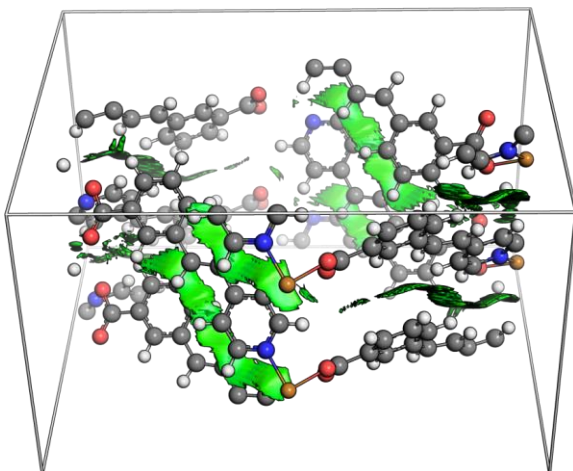

**Figure S16.** NCI isosurface (0.3 bohr) representation for the third domain.

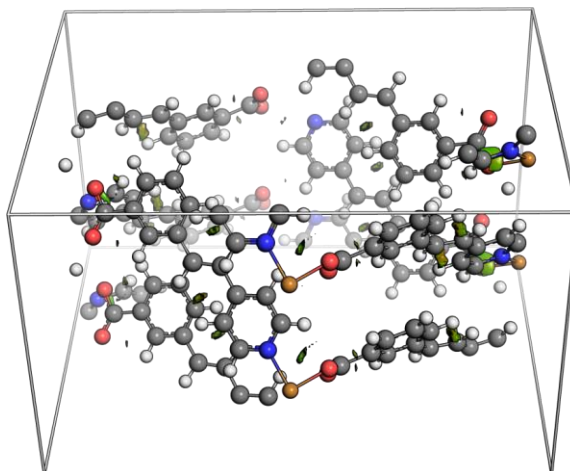

**Figure S17.** NCI isosurface (0.3 bohr) representation for the fourth domain.

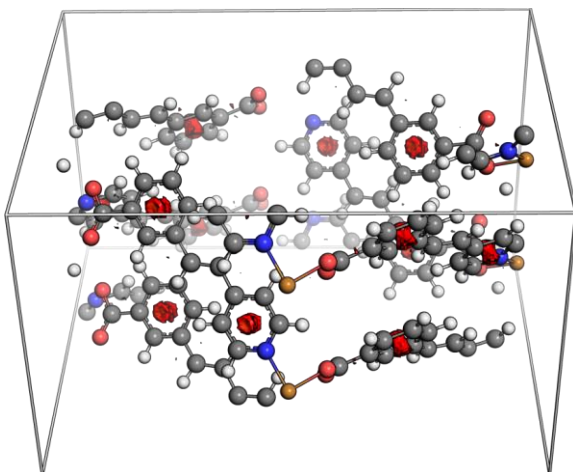

**Figure S18.** NCI isosurface (0.3 bohr) representation for the fifth domain.

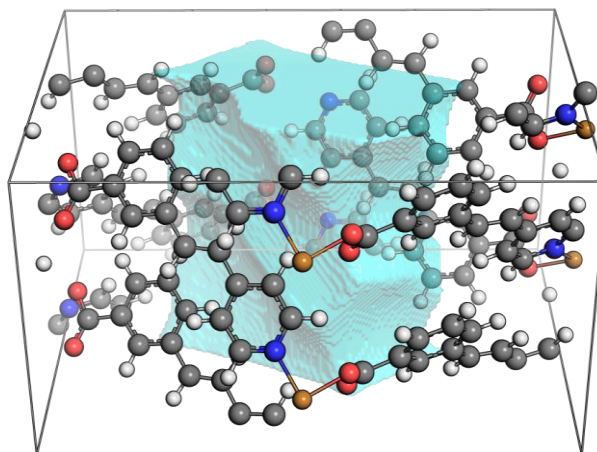

**Figure S19.** Isosurface volume for the central cavity pore highlighted for clarity.

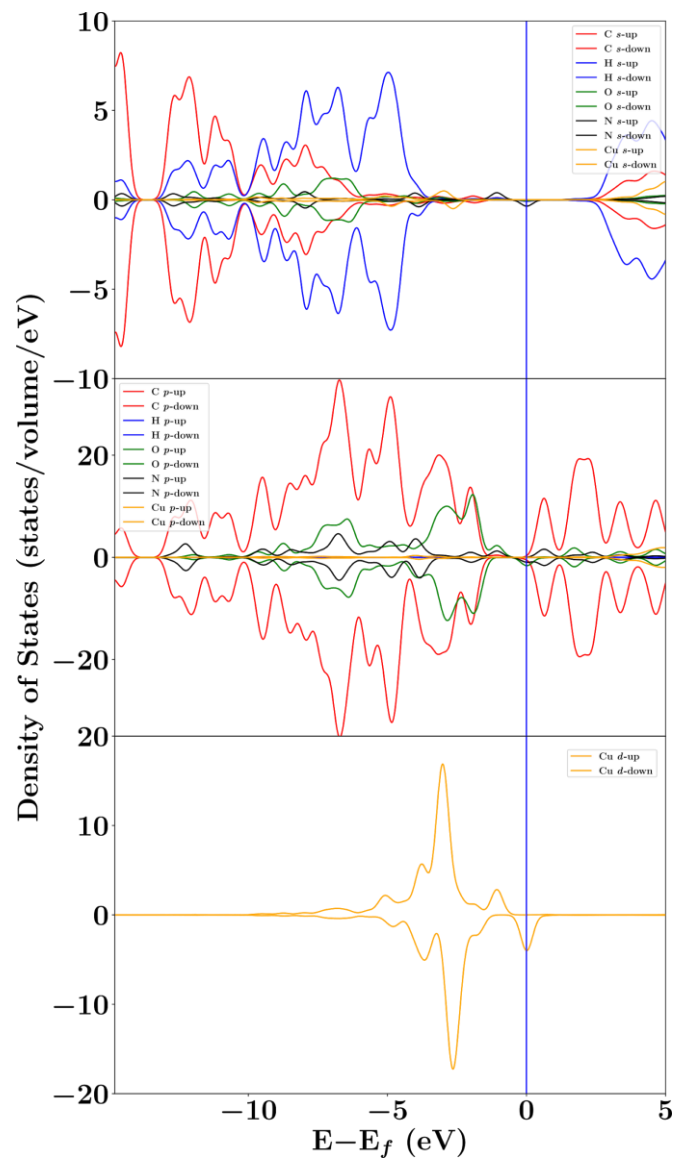

**Figure S20.** PDOS for  $s$ ,  $p$  and  $d$  states for each atomic specie.

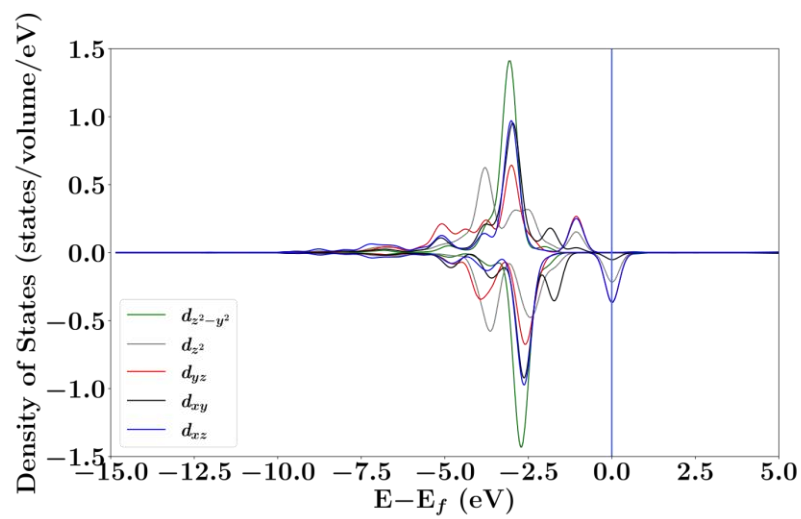

**Figure S21** PDOS for  $d$ -states of copper(II) upon coordination with 4 ligands of **3,4-pvb<sup>-</sup>**.
